## **Home monitoring of HbA1c in diabetes mellitus: A protocol for systematic review and narrative synthesis on reliability, accuracy, and patient acceptability**

Corresponding Author: Jack Colley - Southern Health Foundation Trust

Email address: [jack.colley@southernhealth.nhs.uk](mailto:jack.colley@southernhealth.nhs.uk)

Postal address: Research and Development, Tom Rudd unit, Botley Rd, West End, Southampton SO30 3JB

Telephone number: 023 8047 5200

Hajira Dambha-Miller - Primary Care Research Centre, University of Southampton ([h.dambha-miller@soton.ac.uk](mailto:h.dambha-miller@soton.ac.uk))

Beth Stuart – Primary Care Research Centre, University of Southampton ([bls1@soton.ac.uk](mailto:bls1@soton.ac.uk))

Jazz Bartholomew – Southern Health Foundation Trust ([jazz.bartholomew@nihr.ac.uk](mailto:jazz.bartholomew@nihr.ac.uk))

Hermione Price – Southern Health Foundation Trust ([hermione.price@southernhealth.nhs.uk](mailto:hermione.price@southernhealth.nhs.uk))

### **Abstract**

#### **Introduction**

Worldwide there are an estimated 463 million people with diabetes. [1] In the UK people with diabetes are offered an annual review including monitoring of Haemoglobin A1c (HbA1c). [2] [3] This can identify people with diabetes who are not meeting their glycaemic targets, enabling early intervention. Those who do not attend these reviews often have higher HbA1c levels and poorer health outcomes. [4] During the Coronavirus disease of 2019 (COVID-19) pandemic, there was a 77% reduction in monitoring of HbA1c in the UK. [5] We hypothesise that people with diabetes could take finger-prick samples at home for the measurement of HbA1c.

#### **Method and Analysis**

We will perform a systematic review of current evidence for capillary blood collected at home for the measurement of HbA1c. We will examine the validity, reliability, safety, and patient acceptability of the use of capillary blood compared with the usual standard of care of venous blood. We will explore variables which affect validity of results. Using core terms of 'Diabetes', 'HbA1c' and 'Capillary sampling' we will search MEDLINE, Embase, CINAHL, Web of Science Core Collection, Google Scholar, Open Grey and other grey literature from database inception until 2021. Risk of bias will be assessed using the 'COSMIN risk of bias tool to assess the quality of studies on reliability and measurement error'. Database searches and data extraction for primary outcomes will be conducted in duplicate. We will produce a narrative synthesis exploring how variables of capillary blood collection impact on validity, as well as exploring the safety and acceptability of patient self-collection.

#### **Ethics and Dissemination**

This review will be submitted for publication in a peer-reviewed open-access journal. We will present our results at both national and international conferences. As a systematic review with no primary participant data or involvement, ethical approval is not applicable.

**PROSPERO registration number** CRD42021225606

## Strengths and limitations of this study

- To our knowledge this is the first systematic review to explore all postal methods of capillary blood collection for the measurement of HbA1c.
- This review follows the Preferred Reporting Items for Systematic Reviews and Meta-Analyses guidelines, which offers transparency and enhances reproducibility.
- Due to anticipated heterogeneity in statistical approaches, summary analyses, sample storage, transportation, extraction, and assay, meta-analysis is unlikely to be appropriate and therefore narrative synthesis will be used.
- Due to the exclusion criteria, our findings may not be generalisable to a wider population including children, and those with haemoglobinopathies, high erythrocyte turnover or other conditions likely to affect HbA1c result.

## Background

Diabetes is one of the biggest health issues worldwide. Globally, there are an estimated 463 million people with the disease, a number that has increased four-fold over the last 35 years. [3] [6] [1] In the United Kingdom (UK), 4.9 million people are currently living with diabetes. [7] The prevalence of both type one and type two diabetes is increasing, however this rise is far more alarming in cases of type two diabetes. [8] [9]

The diabetes annual review process consists of a series of health checks recommended by the national service framework and the National Institute for Health and Care Excellence (NICE). [2] [10] These health checks include monitoring of HbA1c, blood pressure, cholesterol, kidney function, urinary albumin, Body Mass Index (BMI), and foot health. There is financial incentive for practices that record a high percentage of patients achieving recommended treatment goals for HbA1c, blood pressure and cholesterol. This process aims to improve standards of care by identifying where people with diabetes may not be meeting recommended targets, which can enable earlier intervention and prevent longer term morbidity.

During the COVID-19 pandemic, the introduction of social distancing led to many health care practitioners working remotely for delivery of routine care. People with diabetes were identified as clinically vulnerable and were advised to adhere stringently to social distancing guidance. [11] [12] [13] As a consequence, in April 2020 there was a reported 77% reduction in monitoring of HbA1c in England, as well as less recorded monitoring of blood pressure, cholesterol, creatinine, urinary albumin, and BMI. There was an estimated 60,000 missed or delayed new diagnoses of diabetes across the UK. [5]

Prior to the COVID-19 pandemic, non-attendance at diabetes outpatient appointments was a sizeable problem. In England in the 2019-20 financial year over six percent of all appointments were not attended, equating to over 7,000,000 appointments wasted, rates are similar in people with diabetes. [14] [15] Perhaps more concerning a recent systematic review suggested non-attenders on average had higher HbA1c levels and worse health outcomes. [4] A system of required attendance at a healthcare setting in order to measure venous HbA1c will inevitably fail to fully address this cohort, who arguably are the most in need of diabetes surveillance.

We hypothesise that people with diabetes could take finger prick samples at home and post these to a laboratory to obtain an HbA1c result. There is a growing body of evidence surrounding the use of

capillary blood and dried blood spots in particular for measuring HbA1c. [16] [17] [18] [19] [20] [21] [22] [23] However, there is still a need for standardisation of collection, storage and transportation methods. [16] [21] [23] To guide standardisation we need to know which methods can produce reliable and valid results, and which variables impact on bias and imprecision of results. We use validity as an all-encompassing term for reliability, precision, and accuracy. Accuracy is used to refer to the similarity of capillary and venous results from the same person. We define reliability as the ability to produce similar results from repeated samples taken over a clinically insignificant time frame. We define precision as whether a test can confidently give a HbA1c result to an exact number, or if less precise, whether it can still inform the clinician of good, moderate, or poor glycaemic control.

We also need to explore whether changes to current practice could introduce new risks, whether that be risks from the blood collection and transport procedure itself, or risks from reduced contact with health professionals as a result of self-collection at home. We also need to know if a self-collected HbA1c test would be acceptable to patients, and what might influence the uptake of such a test.

In this systematic review we aim to explore all currently available evidence examining HbA1c measured from capillary blood compared with venous results, and whether there are viable postal alternatives to venous sampling. We will examine which variables impact the validity of these results. The evidence produced could be a step towards transforming current diabetes practices, especially in more remote communities where the collection, storage and transport of venous blood samples may not be feasible. The COVID-19 pandemic has presented a clear and urgent need for improving access to healthcare remotely in people with diabetes.

## Objectives

- Are HbA1c levels determined from capillary blood obtained via finger-prick testing reliable, and are they valid when compared to venous blood sampling?
- Can HbA1c be measured safely at home by people with diabetes mellitus?
- Is self-collected finger-prick sampling at home, as a means of measuring HbA1c, acceptable to people with diabetes as an alternative to venous blood sampling in a healthcare setting?

## Study Criteria

### Population

Studies of adults aged 18 years or older who are being screened for, monitored, or previously diagnosed with diabetes mellitus. Studies which exclusively look at HbA1c measurement in people with haemoglobinopathies, anaemias, high erythrocyte turnover or other conditions known to affect HbA1c interpretation may be discussed but not included in analysis of validity. Animal studies will not be included.

### Inclusion criteria and Index test

Articles which examine methods of capillary blood self-collection and storage for measurement of HbA1c, which look at test reliability, validity, or patient acceptability as detailed above, will be included. We will not include studies of novel methods still in experimental stages, where validation studies with patient blood specimens have not been carried out. We will include studies using venous blood to test novel methods for capillary blood collection (e.g. the use of venous blood on a dried blood spot). These studies will be differentiated from capillary studies in our analysis. We will only include studies of methods which would be practical to post to people with diabetes, thus excluding most point of care methods or those requiring high intensity storage such as refrigeration. Studies which look at the effect of time, temperature, and other storage variables on capillary HbA1c results will be included.

### **Target condition**

Any form of diabetes mellitus where HbA1c would be used for diagnosis or monitoring. Routine use of HbA1c is not recommended in women in the second or third trimester of pregnancy and therefore studies in this cohort will not be included. [24]

### **Reference standard**

For studies of validity or reliability, the reference standard must be a venous blood test analysed by a certified method for HbA1c testing as listed by the International Federation of Clinical Chemistry and Laboratory Medicine (IFCC) or the National Glycohemoglobin Standardization Program (NGSP). [25] [26] We will exclude studies where the time interval between index test and reference standard is more than two weeks for >10% of participants.

## **Methods**

This protocol is reported according to the Preferred Reporting Items for Systematic Reviews and Meta-Analyses (PRISMA) guidance and has been registered on PROSPERO. [27] [28]

### **Search strategy**

The key search terms are 'Diabetes' AND 'HbA1c' AND 'Capillary sampling' which have been expanded in our full search strategy (Appendix 1 or available through PROSPERO (**registration number** CRD42021225606)). Free text, MESH terms, varied spellings and acronyms have been included to maximise capture of all relevant studies. We will search the Embase, MEDLINE, CINAHL and Web of Science Core Collection databases from database inception to September 2021. We will additionally search the grey literature through OpenGrey as well as using Google Scholar limiting retrieval to the first 200 relevant references as per guidance on optimal database combinations. [29] Ongoing studies and other grey literature will be sought from relevant conference abstracts from 2020 and 2021. Reference lists from the most relevant papers will be hand-searched using an ancestry approach. Results will be restricted to those available in the English language only.

### **Study Selection and Data Management**

Titles and abstracts from search results will be downloaded to Endnote X9, where they will be de-duplicated. They will then be uploaded to Rayyan.ai for review. Two reviewers (JC and JB) will independently screen titles and abstracts against inclusion and exclusion criteria whilst blinded to the other's decisions. Selected studies will then undergo full text review by both reviewers. Any discrepancies that arise during this process will be discussed between the two reviewers until a resolution is reached. Where a resolution cannot be found a third reviewer will be consulted. A PRISMA flow diagram will be used to demonstrate study selection and exclusion. Studies which

undergo full text review will be documented, and if excluded at this stage we will keep record of the reasons for exclusion and make this information available.

We have created a data extraction tool using Microsoft Excel (Version 2102) which was piloted (Appendix 2). Two reviewers will carry out data extraction (JC and JB) and disagreements resolved through discussion.

The data being collected will include information regarding:

- Study Characteristics (Such as country, year, setting, objectives of the study, study inclusion and exclusion criteria)
- Participant Characteristics (Such as population description, age, sex, total number, diabetic status, and dropout rates)
- The capillary blood method/methods being investigated (including details about method used, person collecting the sample, location, storage and shipping conditions, laboratory methods including analysis device, laboratory blinding, resource requirements and timing between test and reference)
- The reference standard (including analysis device used, location of collection, storage and shipping conditions, laboratory blinding and number of available results)
- The primary outcome (including statistical methods used and outcomes relevant to that method, diagnostic thresholds if used, measures of error and bias and any other reported results)
- Additional outcomes (Patient acceptability, and where evidence exists to do so we will collect information on facilitators and barriers to patient uptake)

### **Quality assessment**

We will be using 'COnsensus-based Standards for the selection of health Measurement INstruments (COSMIN) risk of bias tool to assess the quality of studies on reliability and measurement' to assess the quality of selected studies. The COSMIN tool will be piloted by both reviewers (JC and JB) on the first five selected studies. Following this if there is good agreement between both reviewers then the quality assessment for the remaining studies will be carried out by one reviewer only (JC). If there is poor agreement during the pilot this will be discussed between the two reviewers, the tool will be revised or replaced, repiloted, and this process will continue until good agreement is reached. As we are performing narrative synthesis, there will be no limit on what level of quality leads to inclusion. Instead, we will discuss quality of studies as part of the synthesis of their results.

### **Data Synthesis**

From preliminary searches we have identified methodological heterogeneity in the studies identified. There is variability in how data has been presented, studies have either presented outcomes in terms of sensitivity and specificity of HbA1c as a diagnostic test, or at pre-defined clinically significant levels, or as measures of error, with correlation co-efficients, intercepts, Bland-Altman plots, and error grid analyses. There is also heterogeneity in the collection, storage and transportation methods and type of blood used for the index test. Full exploration of heterogeneity will take place following completion of searches, by visual examination of tables ordered by likely modifiers. Identified modifiers will be used to determine subgroups for synthesis, which will in turn be used to determine how these variables can impact validity.

Given the predicted level of heterogeneity, we anticipate the most appropriate method of synthesis will be narrative. We will be following the Synthesis Without Meta-Analysis (SWiM) reporting guidelines adapted for a non-interventional review. [30] The SWiM guidance is tailored towards reviews of intervention, and therefore it may need adapting as we undertake our synthesis. Where

significant heterogeneity exists, meta-analysis can often fail to produce meaningful results by under-representing the overall body of evidence. Narrative synthesis will enable us to incorporate all available evidence despite heterogeneity.

We will discuss measurement outcomes and the appropriateness of each statistical method used to the study design. We will summarise outcomes by their direction of effect (which we define as whether the index test is or isn't valid or reliable for measurement of HbA1c compared to reference standard), and use vote counting to inform our conclusions. We hope to not only present the current evidence, but also identify key gaps in the literature to guide future research.

For the secondary outcome of patient acceptability, the method of synthesis will depend largely on the amount of data available. We would ideally want to perform qualitative synthesis through the use of thematic analysis to further understand facilitators and barriers to patient uptake of home HbA1c measurement. If evidence for patient acceptability is limited, we will instead look at uptake and dropout rates, using this information to infer probable popularity of a proposed at home collection option.

### **Grading the strength of recommendations**

We will be using the Grading of Recommendations, Assessment, Development and Evaluations framework (GRADE) in making our recommendations. [31]

### **Ethics and Dissemination**

As a secondary analysis of existing published data with no primary identifiable personal data being collected no ethics review was required.

This review will be submitted for publication in a peer-reviewed open-access journal. Where invited to do so we will present our results at both national and international relevant conferences. These methods will allow dissemination to patient groups, clinicians, and guideline developers.

### **Patient and Public Involvement**

Patients or the public were not involved in the design of this review.

### **Funding Statement**

The funder and sponsor is Southern Health Foundation Trust. The lead author holds a National Institute for Health Research (NIHR) clinical fellowship. The views and opinions expressed by authors in this publication are those of the authors and do not necessarily reflect those of the UK National Institute for Health Research (NIHR) or the Department of Health and Social Care.

### **Competing Interests**

There are no conflicts of interests for any contributing authors.

## Author Statement

JC and HP were involved in the conceptualisation of the study. JC, HP, HDM and JB made substantial contributions to the design and development of the methodology. BS made substantial contributions to the statistical analysis methodology. JC was responsible for drafting the protocol manuscript. All authors reviewed, edited, and approved the final manuscript.

## Wordcount

Article 2326

Abstract 299

## References

- [1 P. Saeedi, I. Petersohn, P. Salpea and et al, "Global and regional diabetes prevalence estimates for 2019 and projections for 2030 and 2045: Results from the International Diabetes Federation Diabetes Atlas, 9th edition," *Diabetes Research and Clinical Practice*, vol. 157, p. 107843, 2019.
- [2 National Institute for Clinical Excellence, "Diabetes in Adults: Quality standard [QS6]," 18 08 2016. [Online]. Available: <https://www.nice.org.uk/guidance/qs6/chapter/List-of-quality-statements..> [Accessed 23 10 2020].
- [3 NHS Digital, "Quality and Outcomes Framework, 2019-2020," 20 08 2020. [Online]. Available: <https://digital.nhs.uk/data-and-information/publications/statistical/quality-and-outcomes-framework-achievement-prevalence-and-exceptions-data/2019-20..> [Accessed 23 10 2020].
- [4 S. Brewster, J. Bartholomew, R. Holt and H. Price, "Non-attendance at diabetes outpatient appointments: a systematic review," *Diabetic Medicine*, vol. 37, no. 9, pp. 1427-1442, 2020.
- [5 M. Carr, A. Wright, L. Leelarathna and et al, "Impact of COVID-19 on diagnoses, monitoring, and mortality in people with type 2 diabetes in the UK.," *The Lancet. Diabetes & Endocrinology*, vol. 9, no. 7, pp. 413-415, 2021.
- [6 Diabetes UK, "Diabetes UK: Facts & Figures," [Online]. Available: [https://www.diabetes.org.uk/resources-s3/2019-02/1362B\\_Facts%20and%20stats%20Update%20Jan%202019\\_LOW%20RES\\_EXTERNAL.pdf..](https://www.diabetes.org.uk/resources-s3/2019-02/1362B_Facts%20and%20stats%20Update%20Jan%202019_LOW%20RES_EXTERNAL.pdf..) [Accessed 23 10 2020].
- [7 Diabetes UK, "Diabetes diagnoses double in the last 15 years," Diabetes UK, 04 05 2021. [Online]. Available: [https://www.diabetes.org.uk/about\\_us/news/diabetes-diagnoses-doubled-prevalence-2021.](https://www.diabetes.org.uk/about_us/news/diabetes-diagnoses-doubled-prevalence-2021.) [Accessed 25 10 2021].
- [8 M. Khan, M. Hashim, J. King and et al, "Epidemiology of Type 2 Diabetes - Global Burden of Disease and Forecasted Trends," *Journal of Epidemiology and Global Health*, vol. 10, no. 1, pp. 107-111, 2020.
- [9 C. Patterson, S. Karuranga, P. Salpea and et al, "Worldwide estimates of incidence, prevalence and mortality of type 1 diabetes in children and adolescents: Results from the International

- ] Diabetes Federation Diabetes Atlas, 9th edition," *Diabetes Research and Clinical Practice*, vol. 157, p. 107842, 2019.
- [1 Department of Health and Social Care, "National service framework: diabetes," 14 12 2001.  
0] [Online]. Available:  
[https://assets.publishing.service.gov.uk/government/uploads/system/uploads/attachment\\_data/file/198836/National\\_Service\\_Framework\\_for\\_Diabetes.pdf](https://assets.publishing.service.gov.uk/government/uploads/system/uploads/attachment_data/file/198836/National_Service_Framework_for_Diabetes.pdf).. [Accessed 23 10 2020].
- [1 Public Health England, "Guidance on social distancing for everyone in the UK," 2020 03 2020.  
1] [Online]. Available: <https://www.gov.uk/government/publications/covid-19-guidance-on-social-distancing-and-for-vulnerable-people/guidance-on-social-distancing-for-everyone-in-the-uk-and-protecting-older-people-and-vulnerable-adults>.. [Accessed 23 10 2020].
- [1 Y. Zhang, Y. Cui, M. Shen and et al, "Association of diabetes mellitus with disease severity and  
2] prognosis in COVID-19: A retrospective cohort study," *Diabetes Research and Clinical Practice*, vol. 165, p. 108227, 2020.
- [1 Q. Shi, X. Zhang, F. Jiang and et al, "Clinical characteristics and risk factors for mortality of COVID-  
3] 19 patients with diabetes in Wuhan,China: A Two-center retrospective study," *Diabetes Care*, vol. 43, no. 7, pp. 1382-1391, 1010.
- [1 NHS Digital, "Hospital Outpatient Activity 2020-21: Provider level analysis," NHS Digital, 2021.  
4]
- [1 NHS England and Improvement, "NHS inpatient admissions and outpatient referrals and  
5] attendances 2019.," [Online]. Available: <https://www.england.nhs.uk/statistics/wp-content/uploads/sites/2/2019/06/QAR-commentary-Q4-765-updated-130619.pdf>. [Accessed 17 11 2021].
- [1 E. Affan , D. Praveen, C. Chow and et al, "Comparability of HbA1c and lipids measured with dried  
6] blood spot versus venous samples: a systematic review and meta-analysis," *BMC clinical pathology*, vol. 14, no. 1, 2014.
- [1 E. Crimmins, J. Kim, H. McCreath and et al, "Validation of blood-based assays using drief blood  
7] spots for use in large population studies," *Biodemography and social biology*, vol. 60, no. 1, pp. 38-48, 2014.
- [1 J. Hall, C. Fowler, F. Barrett and et al, "HbA1c determination from HemaSpot™ blood collection  
8] devices: comparison of home prepared dried blood spots with standard venous blood analysis," *Diabetic Medicine*, vol. 37, no. 9, pp. 1463-1470, 2020.
- [1 P. Hu, M. Edenfield, A. Potter and et al, "Validation and modification of drief blood spot-based  
9] glycosylated hemoglobin assay for the longitudinal aging study in India," *American Journal of human biology*, vol. 27, no. 4, pp. 579-581, 2015.
- [2 O. Miller, D. Lacher, T. Chen and et al, "Collection and laboratory methods for dried blood spots  
0] for hemoglobin A1c and total and high-density lipoprotein cholesterol in population-based surveys," *Clinica Chimica Acta*, vol. 20, no. 445, pp. 143-154, 2015.
- [2 C. Mastronardi, B. Whittle, R. Tunngley and et al, "The use of dried blood spot sampling for the



- 1] measurement of HbA1c: a cross-sectional study," *BMC Clinical Pathology*, vol. 15, no. 13, 2015.
- [2 Q. Nguyen, E. Whitsel, J. Tabor and et al, "Blood spot-based measures of glucose homeostasis and  
2] diabetes prevalence in a nationally representative population of young US adults," *Annals of Epidemiology*, vol. 24, no. 12, pp. 903-909, 2014.
- [2 D. Thomas, T. Seeman, A. Potter and et al, "HPLC-based measurement of glycated hemoglobin  
3] using dried blood spots collected under adverse field conditions," *Biodemography and social biology*, vol. 64, no. 1, pp. 43-62, 2018.
- [2 National Institute for Clinical Excellence (2015), "Diabetes in Pregnancy: Management from  
4] preconception to the postnatal period [NICE guideline No. 3],"  
<https://www.nice.org.uk/guidance/ng3>.
- [2 International Federation of Clinical Chemistry and Laboratory Medicine, "Certificate  
5] Manufacturers," IFCC, 2021. [Online]. Available: <https://information.ifcchba1c.org/sustainable-implementation/manufacturers/certificate-manufacturers.aspx>. [Accessed 29 November 2021].
- [2 National Glycohemoglobin Standardization Program, "Certified Methods and Laboratories,"  
6] NGSP, 2021. [Online]. Available: <http://www.ngsp.org/certified.asp>. [Accessed 29 November 2021].
- [2 M. Page, J. McKenzie, P. Bossuyt and et al, "The PRISMA 2020 statement: an updated guideline  
7] for reporting systematic reviews," *British Medical Journal*, vol. 371, p. n71, 2021.
- [2 National Institute for Health Research, "PROSPERO: International prospective register of  
8] systematic reviews," National Institute for Health Research, [Online]. Available:  
<https://www.crd.york.ac.uk/prospéro/>. [Accessed 18 October 2021].
- [2 W. Bramer, M. Rethlefsen, J. Kleijnen and et al, "Optimal database combinations for literature  
9] searches in systematic reviews: a prospective exploratory study," *Systematic Reviews*, vol. 6, no. 1, p. 245, 2017.
- [3 M. Campbell, J. McKenzie, A. Sowden and et al, "Synthesis without meta-analysis (SWiM) in  
0] systematic reviews: reporting guideline," *British Medical Journal*, vol. 368, p. 16890, 2020.
- [3 H. Schünemann, J. Brozek and A. Oxman, GRADE handbook for Grading quality of evidence and  
1] strength of recommendation. Version 3.2 [Updated March 2009] Available at  
<https://grade.pro.org/>, 2009.

## **Appendices**

### **Appendix 1:**

#### **Search Strategies**

##### **Medline Search Strategy:**

1. exp Diabetes Mellitus/

2. Diabet\*.mp.
3. T1DM.mp.
4. T2DM.mp.
5. "Impaired glucose tolerance".mp.
6. "Impaired fasting glucose".mp.
7. pre-diabetes.mp.
8. prediabetes.mp.
9. LADA.mp.
10. MODY.mp.
11. IDDM.mp.
12. NIDDM.mp.
13. Hyperglyc\*.mp.
14. 1 or 2 or 3 or 4 or 5 or 6 or 7 or 8 or 9 or 10 or 11 or 12 or 13
15. Glycated Hemoglobin A/
16. HbA1c.mp.
17. A1c.mp.
18. HgbA1c.mp.
19. Hb1c.mp.
20. "Hb A1".mp.
21. "Hb A1a+b".mp.
22. "Hb A1b".mp.
23. HbA1.mp.
24. "Glycated H?emoglobin".mp.
25. "Glycosylated h?emoglobin".mp.
26. Glycoh?emoglobin.mp.
27. "H?emoglobin A(1)".mp.
28. "H?emoglobin A, Glycosylated".mp.
29. "H?emoglobin, glycosylated".mp.
30. 15 or 16 or 17 or 18 or 19 or 20 or 21 or 22 or 23 or 24 or 25 or 26 or 27 or 28 or 29
31. "H?emoglobin A1c Test Kit".mp.
32. "capillary blood sampling".mp.
33. "finger prick".mp.
34. fingerprick.mp.
35. "finger stick".mp.
36. fingerstick.mp.
37. "Heel prick".mp.
38. heelprick.mp.
39. Lancet.mp.
40. Lancing.mp.
41. Dried Blood Spot Testing/
42. "Dry blood spot".mp.
43. DBS.mp.
44. "capillary tube".mp.
45. microtube.mp.
46. "micro tube".mp.
47. "P?ediatric tube".mp.
48. "blood sampling device".mp.
49. "blood sampling needle".mp.
50. Point-of-Care Systems/
51. point-of-care systems/ or point-of-care testing/
52. "point of care".mp.

53. "blood collection paper".mp.
54. 31 or 32 or 33 or 34 or 35 or 36 or 37 or 38 or 39 or 40 or 41 or 42 or 43 or 44 or 45 or 46 or 47 or 48 or 49 or 50 or 51 or 52 or 53
55. 14 and 30 and 54
56. limit 55 to (english language and humans)

**Embase Search Strategy:**

1. exp diabetes mellitus/
2. diabet\*.mp.
3. "Impaired fasting glucose".mp.
4. pre?diabetes.mp.
5. LADA.mp.
6. MODY.mp.
7. hyperglycemia/
8. 1 or 2 or 3 or 4 or 5 or 6 or 7
9. exp hemoglobin A1c/
10. A1c.mp.
11. HgbA1c.mp.
12. Hb1c.mp.
13. "Hb A1".mp.
14. "Hb A1a+b".mp.
15. "Hb A1b".mp.
16. HbA1.mp.
17. "Glycosylated Hemoglobin".mp.
18. "Hemoglobin A(1)".mp.
19. "Haemoglobin A(1)".mp.
20. "HbA(1c)".mp.
21. 9 or 10 or 11 or 12 or 13 or 14 or 15 or 16 or 17 or 18 or 19 or 20
22. dried blood spot testing/
23. exp hemoglobin A1c test kit/
24. capillary blood/
25. "capillary blood sampling".mp.
26. "Finger prick".mp.
27. Fingerprick.mp.
28. "Finger stick".mp.
29. Fingerstick.mp.
30. DBS.mp.
31. "Heel prick".mp.
32. Heelprick.mp.
33. Lancet.mp.
34. capillary tube/
35. microtube.mp.
36. "micro tube".mp.
37. "P?ediatric tube".mp.
38. "Lancing device".mp.
39. blood sampling device/
40. blood collection needle/
41. "blood collection paper".mp.
42. "point of care system"/ or "point of care testing"/

43. 22 or 23 or 24 or 25 or 26 or 27 or 28 or 29 or 30 or 31 or 32 or 33 or 34 or 35 or 36 or 37 or 38  
or 39 or 40 or 41 or 42  
44. 8 and 21 and 43  
45. limit 44 to (human and english language)

### **CINAHL search strategy**

S62 S15 AND S39 AND S61 Limiters - English Language  
S61 S40 OR S41 OR S42 OR S43 OR S44 OR S45 OR S46 OR S47 OR S48 OR S49 OR S50 OR S51 OR  
S52 OR S53 OR S54 OR S55 OR S56 OR S57 OR S58 OR S59 OR S60  
S60 poc  
S59 poct  
S58 "point of care"  
S57 "blood sampling device"  
S56 "P#ediatric tube"  
S55 "micro tube"  
S54 Microtube  
S53 "capillary tube"  
S52 DBS  
S51 "dry blood spot"  
S50 "dried blood spot"  
S49 "Lancing"  
S48 Lancet  
S47 heel prick  
S46 "Heel prick"  
S45 fingerstick  
S44 "finger stick"  
S43 fingerprick  
S42 "finger prick"  
S41 "capillary blood sampling"  
S40 "Hemoglobin A1c test kit"  
S39 S16 OR S17 OR S18 OR S19 OR S20 OR S21 OR S22 OR S23 OR S24 OR S25 OR S26 OR S27 OR  
S28 OR S29 OR S30 OR S31 OR S32 OR S33 OR S34 OR S35 OR S36 OR S37 OR S38  
S38 HbA(1c)  
S37 "H#emoglobin, glycosylated"  
S36 "Hemoglobin, glycosylated"  
S35 "H#emoglobin A, Glycosylated"  
S34 "H#emoglobin A(1)"  
S33 "Hemoglobin A(1)"  
S32 "Glycoh#emoglobin"  
S31 Glycohemoglobin  
S30 "glycosylated h#emoglobin"  
S29 "glycosylated hemoglobin"  
S28 "glycated hemoglobin"  
S27 "Glycated h#emoglobin"  
S26 "HbA1"  
S25 "HbA1b"  
S24 "Hb A1b"  
S23 "Hb A1a+b"  
S22 "Hb A1"  
S21 "Hb1c"

S20 "hgba1c"  
S19 A1c  
S18 HbA1c  
S17 "Glycated h#emoglobin A"  
S16 (MH "Hemoglobin A, Glycosylated")  
S15 S1 OR S2 OR S3 OR S4 OR S5 OR S6 OR S7 OR S8 OR S9 OR S10 OR S11 OR S12 OR S13 OR S14  
S14 Hyperglyc\*  
S13 (MH "Hyperglycemia+")  
S12 "Impaired fasting glucose"  
S11 "Impaired glucose tolerance"  
S10 T2DM  
S9 T1DM  
S8 NIDDM  
S7 IDDM  
S6 prediabet\*  
S5 pre-diabet\*  
S4 diabet\*  
S3 MODY  
S2 LADA  
S1 (MH "Diabetes Mellitus+")

#### **Web of Science: Core Collection search strategy**

50 ((#13) AND #27) AND #48 and English (Languages)  
49 ((#13) AND #27) AND #48  
48 ((((((((((((((((((#28) OR #29) OR #30) OR #31) OR #32) OR #33) OR #34) OR #35) OR #36) OR #37)  
OR #38) OR #39) OR #40) OR #41) OR #42) OR #43) OR #44) OR #45) OR #46) OR #47  
47 ALL=(POCT)  
46 ALL=(POC)  
45 ALL=("Point of care")  
44 ALL=("Blood sampling")  
43 ALL=("P\*ediatric tube")  
42 ALL=("micro tube")  
41 ALL=(Microtube)  
40 ALL=(DBS)  
39 ALL=("Dry Blood Spot")  
38 ALL=("Dried Blood Spot")  
37 ALL=("Capillary tube")  
36 ALL=(Lancing)  
35 ALL=(Lancet)  
34 ALL=("Heel prick")  
33 ALL=(Heelprick)  
32 ALL=("Finger stick")  
31 ALL=(Fingerstick)  
30 ALL=("finger prick")  
29 ALL=(Fingerprick)  
28 ALL=("Capillary blood")  
27 ((((((((((((((((((#14) OR #15) OR #16) OR #17) OR #18) OR #19) OR #20) OR #21) OR #22) OR #23) OR  
#24) OR #25) OR #26  
26 ALL=(HbA(1c))

25 ALL=("H\*emoglobin, glycosylated")  
24 ALL=("H\*emoglobin A, Glycosylated")  
23 ALL=("H\*emoglobin A(1)")  
22 ALL=(glycoh\*emoglobin)  
21 ALL=("glycosylated h\*emoglobin")  
20 ALL=("Glycated h\*emoglobin")  
19 ALL=(HbA1)  
18 ALL=("Hb A1")  
17 ALL=(Hb1c)  
16 ALL=(HgbA1c)  
15 ALL=(A1c)  
14 ALL=(HbA1c)  
13 ((((((((((#1) OR #2) OR #3) OR #4) OR #5) OR #6) OR #7) OR #8) OR #9) OR #10) OR #11) OR #12  
12 ALL=(Hyperglyc\*)  
11 ALL=(NIDDM)  
10 ALL=(IDDM)  
9 ALL=(MODY)  
8 ALL=(LADA)  
7 ALL=("Impaired fasting glucose")  
6 ALL=("Impaired glucose tolerance")  
5 ALL=(T2DM)  
4 ALL=(T1DM)  
3 ALL=(pre-diabet\*)  
2 ALL=(prediabet\*)  
1 ALL=(Diabet\*)

### **Google Scholar search strategy**

Diabetes | Diabetic | T1DM | T2DM | MODY | IDDM | NIDDM | Hyperglycaemia | HbA1c | A1c | "Glycated haemoglobin" | "Glycated haemoglobin" | "Glycosylated haemoglobin" | "Glycosylated haemoglobin" | "Finger prick" | "Hemoglobin A1c test kit" | DBS | "Dried blood spot" | Capillary | Lancet
